# Supplementary material for: Effect of soil coarseness on soil base cations and available micronutrients in a semi-arid sandy grassland
Source: Copernicus journal article supplement (doi:10.5194/se-2016-18), 2016-01-27
Supplement: Supplementary file 1 [file se-2016-18-supplement.pdf]

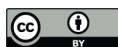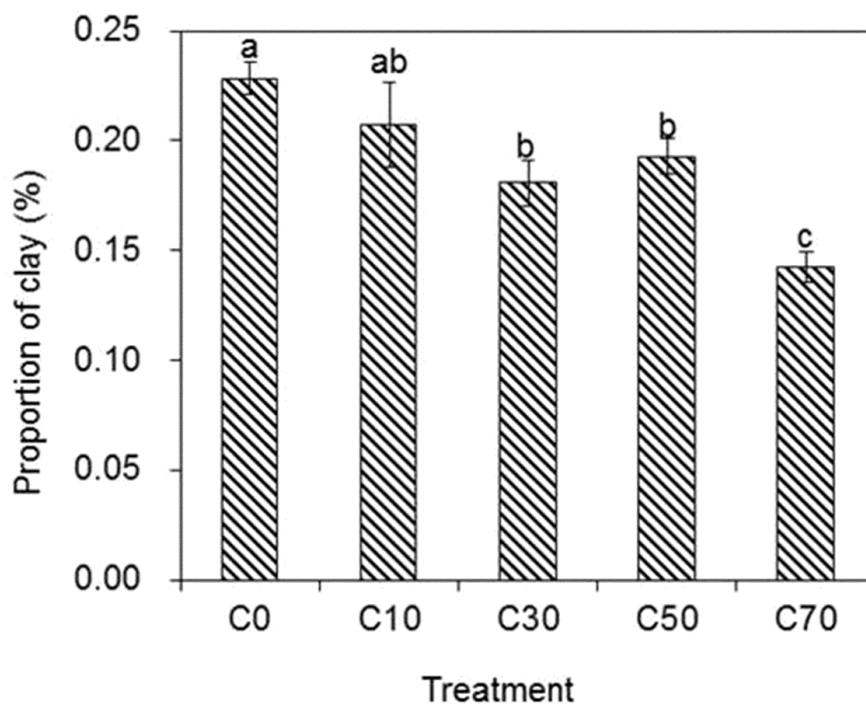

**Fig. S1** Proportion of soil clay particles for 0-10 cm soil in different soil coarseness  
5 degrees of 0% sand addition (C0), 10% (C10), 30% (C30), 50% (C50) and 70% (C70).  
Data represent mean  $\pm$  SE (n=6). Letters indicate significant differences among  
treatments.
