# Supplementary material for: Effect of soil coarseness on soil base cations and available micronutrients in a semi-arid sandy grassland
Source: Copernicus journal article supplement (doi:10.5194/se-2016-18), 2016-01-27
Supplement: Supplementary file [file se-2016-18-AC1-supplement.pdf]

1           **Effect of soil coarseness on soil base cations and available**  
2           **micronutrients in a semi-arid sandy grassland**

3   Linyou Lü<sup>1,2</sup>, Ruzhen Wang<sup>1,\*</sup>, Heyong Liu<sup>1,3</sup>, Jinfei Yin<sup>1,4</sup>, Jiangtao Xiao<sup>1,4</sup>,

4   Zhengwen Wang<sup>1</sup>, Yan Zhao<sup>2</sup>, Guoqing Yu<sup>2</sup>, Xingguo Han<sup>1</sup>, Yong Jiang<sup>1</sup>

5   <sup>1</sup> State Key Laboratory of Forest and Soil Ecology, Institute of Applied Ecology,

6   Chinese Academy of Sciences, Shenyang 110016, China

7   <sup>2</sup> Institute of Sand Fixation and Utilization, Liaoning Academy of Agricultural

8   Sciences, Fuxin 123000, China

9   <sup>3</sup> Key Laboratory of Regional Environment and Eco-remediation, College of

10   Environment, Shenyang University, Shenyang 110044, China

11   <sup>4</sup> University of Chinese Academy of Sciences, Beijing 10049, China

12   \* Corresponding author: Tel.: +86 24 83970603; fax: +86 24 83970300.

13   E-mail address: [ruzhenwang@iae.ac.cn](mailto:ruzhenwang@iae.ac.cn) (Ruzhen Wang)

14

15 **Abstract**

16 Soil coarseness is the main process decreasing soil organic matter and threatening the  
17 productivity of sandy grasslands. Previous studies demonstrated negative effect of soil  
18 coarseness on soil carbon storage, but less is known about how soil base cations  
19 (exchangeable Ca, Mg, K, and Na) and available micronutrients (available Fe, Mn, Cu,  
20 and Zn) response to soil coarseness. In a semi-arid grassland of northern China, a field  
21 experiment was initiated in 2011 to mimic the effect of soil coarseness on soil base  
22 cations and available micronutrients by mixing soil with different mass proportions of  
23 sand: 0% coarse elements (C0), 10% (C10), 30% (C30), 50% (C50), and 70% (C70).  
24 Soil coarseness significantly increased soil pH in three soil depths of 0-10 cm, 10-20  
25 cm and 20-40 cm with the highest pH values detected in C50 and C70 treatments. Soil  
26 fine particles (smaller than 0.25 mm) significantly decreased with the degree of soil  
27 coarseness. Exchangeable Ca and Mg concentrations significantly decreased with soil  
28 coarseness degree by up to 29.8% (in C70) and 47.5% (in C70), respectively, across  
29 three soil depths. Soil available Fe, Mn and Cu significantly decreased with soil  
30 coarseness degree by 62.5%, 45.4% and 44.4%, respectively. As affected by soil  
31 coarseness, the increase of soil pH, decrease of soil fine particles (including clay), and  
32 decline in soil organic matter were the main driving factors for the decrease of  
33 exchangeable base cations (except K) and available micronutrients (except Zn)  
34 through soil profile. Developed under soil coarseness, the loss and redistribution of  
35 base cations and available micronutrients along soil depths might pose threat to  
36 ecosystem productivity of this sandy grassland.

37 *Key words:* soil degradation, dryland ecosystem, sandy soil, soil texture, Calcium,

38 Manganese

39

## 40 **1 Introduction**

41 Dryland ecosystems, accounting for 41% of the total land area of the world, are prone  
42 to desertification which would result in soil coarseness (Cerdà et al., 2014; Wang et al.,  
43 2015a). Dryland ecosystems represent 25% of land surface area in Latin America with  
44 75% of them having desertification problems (Torres et al., 2015). Desertified land  
45 area has been reported to reach 45.6 million km<sup>2</sup> (Torres et al., 2015) and accounted  
46 for 74% of total dryland area (61.5 million km<sup>2</sup>) with more than 100 countries and  
47 8.5×10<sup>8</sup> people being affected (Miao et al., 2015; Vieira et al., 2015; Wang et al.,  
48 2015a). Desertification exerts large impact on social and economic resources (Beyene,  
49 2015; Escadafal et al., 2015). Areas susceptible to desertification tend to be marked by  
50 socioeconomic inequality and have low human development index in Brazil (Vieira et  
51 al., 2015). Desertification was reported to cause economic losses of up to €6 billion in  
52 Northern China in the year of 2005 (Miao et al., 2015).

53 In China, most of the grasslands have undergone degradation and desertification  
54 with 50% distributed in the agro-pastoral transition zone of northern China (Wang et  
55 al., 2015a; Yan and Cai, 2015). Continuous grazing and intense cultivation can reduce  
56 vegetation cover and litter accumulation which exposes the ground surface to wind  
57 erosion in the erosion-prone sandy lands (Su et al., 2005). Desertification and wind  
58 erosion processes in fragile arid and semi-arid rangelands have contributed to  
59 increased soil coarseness (Yan and Cai, 2015). Together with reduction of plant cover,  
60 increased soil coarseness contribute to loss of agricultural productivity, environmental  
61 deterioration, and associated social and economic disruptions (Vieira et al., 2015; Xie

62 et al., 2015). In this case, it is urgent to combat desertification and study the causes,  
63 processes, consequences, and mechanisms of soil coarseness (Xu et al., 2012;  
64 Weinzierl et al., 2015).

65 Soil base cations are not only essential nutrient cations for both plants and soil  
66 microbes, but also serve as one of the main mechanisms of soil acid buffering  
67 capacity (Lu et al., 2014) as well as a good indicator of soil fertility (Zhang et al.,  
68 2013). Micronutrient availabilities essentially affect terrestrial net primary production,  
69 plant quality, and consequently food and forage supply worldwide (Cheng et al., 2010;  
70 Marques et al., 2015). Current research about desertification and soil coarseness  
71 mainly focus on its effects on degradation of forest and grasslands due to logging and  
72 overgrazing (Conte et al., 1999; Cao et al., 2008), C and N depletion in soils and plant  
73 components (Zhou et al., 2008; Bisaro et al., 2014), soil compaction and erosion risk  
74 (Allington and Valone, 2010), and soil physical properties of particle size distributions  
75 (Su et al., 2004; Huang et al., 2007). However, less is known about the changes in soil  
76 base cations and availabilities of micronutrient during dryland desertification and soil  
77 coarseness.

78 Soil coarseness is suggested to cause decrease of soil silt and clay contents (Zhou  
79 et al., 2008), decline in soil C and nutrient (such as N and P) concentrations (Xie et al.,  
80 2015), and losses in species diversity and productivity (Zhao et al., 2006; Huang et al.,  
81 2007). As biogeochemical cyclings of base cations and micronutrients are largely  
82 controlled by soil organic matter (SOM) (complexation and chelation) (Sharma et al.,  
83 2004) and properties of soil mineral (reversible sorption and desorption processes)

84 (Jobb gy et al., 2004), decrease of SOM and soil fine particles would potentially  
85 decrease soil base cations and micronutrient availability. Also, the changes in SOM  
86 along soil depth could shape the vertical distribution of base cations and available  
87 micronutrients (Sharma et al., 2004).

88 The Horqin Sandy Land, or Horqin Sandy Grassland is an important part of Inner  
89 Mongolia grassland and one of the main sandy areas in northern China covering  
90 approximately 43,000 km<sup>2</sup> (Li et al., 2004). With windy and dry winters and springs  
91 in Horqin region, the soils are prone to aeolian soil erosion and soil coarseness  
92 especially when natural sandy grassland is converted into farmland (Li et al., 2004).  
93 To examine the effect of soil coarseness during desertification on the concentrations  
94 of soil base cation (exchangeable Ca, Mg, K, and Na) and available micronutrient (Fe,  
95 Mn, Cu, and Zn) of this region, we set up a field experiment in Zhanggutai by mixing  
96 the soil with different mass proportions of sand: 10% (light soil coarseness), 30%  
97 (moderate soil coarseness), 50% (heavy soil coarseness), and 70% (severe soil  
98 coarseness). We hypothesized that both soil base cations and available micronutrients  
99 would decrease with the increasing degree of soil coarseness due to the decrease of  
100 SOM and soil fine particles. We also expected that soil base cations and available  
101 micronutrients would decrease with soil depth.

102

## 103 **2 Materials and methods**

### 104 **2.1 Study area**

105 The study was conducted at the Desertified Grassland Restoration Research Station

106 maintained by Institute of Sand Fixation and Utilization, Liaoning Academy of  
107 Agricultural Sciences. The study site (42°43'N and 122°22'E, elevation 226.5 m a.s.l.)  
108 was located in the southeast of Horqin Sandy Land, near Zhanggutai Town, Zhangwu  
109 County, Liaoning Province, China (Fig. 1). Productive grasslands from Zhanggutai  
110 County have undergone severe desertification due to intense cultivation, overgrazing  
111 and increased population (Li et al., 2000; Chen et al., 2005). The soils are susceptible  
112 to wind erosion as a result of decrease in plant cover and high annual wind velocity  
113 (varies from 3.4 to 4.1 m s<sup>-1</sup>) with frequent occurrence of gales (wind speed > 20 m s<sup>-1</sup>)  
114 (Li et al., 2000). The mean annual temperature is 6.2 °C and mean annual  
115 precipitation is about 450 mm which defines the area as semi-arid (Chen et al., 2005).  
116 The frost-free period lasts approximately 150 days (Chen et al., 2005). Soil texture of  
117 the experiment site is sandy soil with 99.32 ±0.13 % sand, 0.45 ±0.14 % silt, and  
118 0.23 ±0.02 % clay (means ± standard deviation, data measured from control soil).  
119 The soil type is classified as a Aeolic Eutric Arenosol according to the FAO  
120 classification (IUSS Working Group WRB, 2014). This area constitutes an  
121 agro-pastoral ecotone which is severely degraded due to excessive cultivation and  
122 grazing (Chen et al., 2005).

123

## 124 **2.2 Experimental design**

125 In May 2011, a complete randomized design was applied to the site. Within a 24 m ×  
126 29 m area (696 m<sup>2</sup>), thirty 4 m × 4 m plots were established for five treatments with  
127 six replicates per treatment. The soil within this experimental area is homogenous.

128 Adjacent plots were separated by 1 m buffer zone and PVC plates to prevent water  
129 and nutrient exchanges. A certain mass proportion of 2 mm- sieved river sand  
130 (siliceous, pH  $7.5 \pm 0.2$ ) was mixed with native soil for each of three depths (0-20 cm,  
131 20-40 cm, and 40-60 cm). Three soil depths were considered in this study to study  
132 effect of soil coarseness on soil properties of plant root layer (0-20 cm), transition  
133 layer of plant roots (20-40 cm), and transition layer of soil genesis (40-60 cm). To mix  
134 the river sand and native soils evenly in each plot, soils of each depth were dug out  
135 and mixed with the sand by agitators in the same mass proportion separately. The soils  
136 were refilled back to the field in respective depths after mixture. The proportions are 0,  
137 10%, 30%, 50%, and 70% to mimic different soil coarseness degrees or intensities:  
138 control grassland without soil coarseness (C0), light soil coarseness (C10), moderate  
139 soil coarseness (C30), heavy soil coarseness (C50), and severe soil coarseness (C70),  
140 respectively. In August 2012, 0-5 cm soils of all plots were taken out and autoclaved  
141 at 105 °C for 3 h to deactivate the seeds and then refilled back. This was adequate to  
142 prevent the reproduction of original plants. In July 2013, plant community was  
143 transplanted from local natural grassland according to its species composition by  
144 point quadrats (Goodall, 1952). Plant community composition was investigated in a  
145 permanent quadrat of 1 m  $\times$  1 m at August of 2014 and 2015 (unpublished data). The  
146 chemical characteristics of the 0-10 cm soil are given in Table 1.

147

### 148 **2.3 Soil sampling and chemical analysis**

149 In October 2015 (i.e. after 2 years of plant community settled), a composite soil



150 sample was taken from three randomly selected locations within each plot from three  
151 soil layers of 0-10 cm, 10-20 cm, and 20-40 cm, respectively. Fresh soil samples were  
152 sieved through 2 mm screen and visible plant roots were taken out. After  
153 transportation to laboratory, the soils were air-dried and a subsample of the soil was  
154 ground for C and N analysis.

155

### 156 **2.3.1 Soil pH and particle size distribution**

157 Soil pH was determined in a 1:2.5 (w/v) soil-to-water extract of soil samples from all  
158 treatments with a PHS-3G digital pH meter (Precision and Scientific Corp., Shanghai,  
159 China). Soil particle size distribution was determined by the pipette method in a  
160 sedimentation cylinder, using Na-hexamethaphosphate as the dispersing agent (Zhao  
161 et al., 2006). Proportion of soil fine particles (<0.25mm) were calculated by summing  
162 up the proportions of fine sand, silt and clay in this study.

163

### 164 **2.3.2 Soil base cations (Ca, Mg, K, Na) and available micronutrients (Fe, Mn, Cu, 165 Zn)**

166 Soil base cations were determined using the  $\text{CH}_3\text{COONH}_4$ -extraction method  
167 according to Ochoa-Hueso et al. (2014). Briefly, 2.5 g of soil sample was extracted  
168 with 1 M  $\text{CH}_3\text{COONH}_4$  (pH 7.0) with a soil:extractant ratio of 1:20 (w/v) and shaken  
169 at 150 rpm for 30 min. After filtration with Whatman no. 2V filter paper, the  
170 concentrations of soil base cations were determined by atomic absorption  
171 spectrometer (AAS, Shimazu, Japan).

172 Available Fe, Mn, Cu and Zn were extracted by diethylenetriaminepentaacetic  
173 acid (DTPA) according to method of Lindsay and Norvell (1978). Briefly, 10 g of soil  
174 samples was mixed with 20 ml 0.005 M DTPA + 0.01 M CaCl<sub>2</sub> + 0.1 M  
175 triethanolamine (TEA) (pH 7.0). The slurry was shaken at 180 rpm for 2 h and filtered  
176 through Whatman no. 2V filter paper. The concentrations of available micronutrients  
177 were analyzed by AAS.

178

## 179 **2.4 Statistical analyses**

180 The normality of data was tested using the Kolmogorov-Smirnov test, and  
181 homogeneity of variances using Leven's test. Effects of soil coarseness on soil pH,  
182 fine particles, base cations and available micronutrients were determined by one-way  
183 ANOVA. Multiple comparisons with Duncan design were performed to determined  
184 difference in soil parameters among soil coarseness degrees. Pearson correlation  
185 analysis was used to examine the relationship among soil parameters. Multivariate  
186 linear regression analyses (stepwise removal) were conducted to determine variables  
187 that made significant contributions to variance of soil base cations and available  
188 micronutrients. All statistical analyses were performed in SPSS 16.0 (SPSS, Inc.,  
189 Chicago, IL, U.S.A) and statistical significance was accepted at  $P < 0.05$ .

190

## 191 **3 Results**

### 192 **3.1 Soil pH**

193 Soil coarseness significantly increased soil pH by up to 8.8% across three soil depths

194 (Fig. 2a; Table 2). For both 0-10 cm and 10-20 cm soils, the highest soil pH was  
195 detected in C70 (7.3 and 7.4, respectively) and C50 (7.2 and 7.3, respectively) soils,  
196 which were followed by C30 and C10 soils (Fig 2a). Significant and positive overall  
197 effect of soil depth was detected on soil pH (Fig. 2a; Table 2). For both C0 and C50  
198 treatments, soil pH of 10-20 cm and 20-40 cm was significantly higher as compared  
199 to that of 0-10 cm soil (Fig. 2a). Soil pH in 10-20 cm of C10 and C30 was  
200 significantly higher than that in 0-10 cm of C10 and C30, respectively (Fig. 2a).  
201 Significant interactive effect of soil coarseness and soil depth was found on soil pH  
202 (Table 2).

203 Proportions of soil fine particles (< 0.25 mm) were determined in 0-10 cm soil.  
204 Soil fine particles significantly decreased with soil coarseness degree by 6.3% (for  
205 treatment of C10), 17.7% (C30), 34.1% (C50), and 55.6% (C70) as compared to C0  
206 (Fig. 2b). The lowest proportion of soil fine particles was detected in C70 (39.1%),  
207 and followed by C50 (58.1%) (Fig. 2b). Proportion of clay particles significantly  
208 decreased under soil coarseness (Fig. S1).

209

### 210 **3.2 Soil base cations**

211 Across three soil depths, soil coarseness significantly decreased both exchangeable Ca  
212 and Mg concentrations by up to 29.8% and 47.5%, respectively, as compared to C0  
213 (Fig. 3a,b). Both exchangeable Ca and Mg concentrations were the lowest in the C70  
214 and followed by C50 as compared to C0 in all soil depths (Fig. 3a,b). Soil depth  
215 significantly decreased soil exchangeable Mg, while showed no effect on

216 exchangeable Ca (Table 2). Both soil coarseness and soil depth had no impact on soil  
217 exchangeable K (Fig. 3c). At 0-10 cm, C50 and C70 significantly decreased soil  
218 exchangeable Na by 22.3% and 24.2%, respectively, as compared to C0 (Fig. 3d). Soil  
219 exchangeable Na did not change with soil depth (Fig. 3d, Table 2).

220

### 221 **3.3 Soil available micronutrients**

222 Soil available Fe significantly decreased with soil coarseness degree by as much as  
223 17.1% in C10, 22.0% in C30, 36.6% in C50 and 62.5% in C70 across three soil  
224 depths (Fig. 4a). Soil coarseness significantly decreased soil available Mn for 0-10 cm  
225 (by up to 17.3% in C70) and 10-20 cm (by up to 45.4% in C70) soils (Fig. 4b). Both  
226 soil available Fe and Mn significantly decreased with soil depth (Fig. 4a,b; Table 2).  
227 Significant negative desertification effect was detected on soil available Cu by 14.7%  
228 - 44.4% as compared to C0 in 0-10 cm soil (Fig. 4c). For both C30 and C50  
229 treatments, soil available Cu concentration of 10-20 cm soil was significantly higher  
230 than that in 0-10 cm and 20-40 cm soils. Soil available Zn concentration was not  
231 affected by soil coarseness but it decreased with soil depth (Fig. 4d; Table 2).

232

### 233 **3.4 Regression analyses between soil parameters**

234 All regression analysis were conducted for 0-10 cm soil as the data of fine particles (<  
235 0.25 mm) were only available for 0-10 cm soil. At 0-10 cm soil, soil pH significantly  
236 and negatively correlated with exchangeable Ca, Mg and Na, and with available Fe,  
237 Mn and Cu (Table 3). Soil fine particles (< 0.25 mm) significantly and positively

238 correlated with exchangeable Ca, exchangeable Mg, exchangeable Na, available Fe,  
239 available Mn, and available Cu (Table 3). The SOC significantly and positively  
240 correlated with exchangeable Ca, Mg, Na, available Fe, Mn, and Cu (Table 3).

241 According to multiple regression models, change of soil fine particles explained  
242 65.5%, 75.7%, 31.4%, 24.0% of variations in exchangeable Ca, Mg, Na, and available  
243 Mn (Table 3). Soil pH explained 75.7% of variation in available Fe (Table 2). The  
244 SOC explained 59.3% of variation in available Cu (Table 2).

245

## 246 **4 Discussion**

### 247 **4.1 Effect of soil coarseness on soil base cations and available micronutrients**

248 Significant decrease in exchangeable Ca and Mg concentrations in three soil depths  
249 and exchangeable Na in 0-10 cm soil as affected by soil coarseness partially  
250 supported our first hypothesis. The decrease of exchangeable Ca, Mg and Na might be  
251 due to increase of soil pH under soil coarseness as suggested by the significant and  
252 negative correlation between soil pH and exchangeable Ca, Mg and Na (Table 3).  
253 Indeed, with the increase of soil pH, soil base cations (such as  $\text{Ca}^{2+}$  and  $\text{Mg}^{2+}$ ) and  
254 available micronutrients ( $\text{Fe}^{2+}$ ,  $\text{Mn}^{2+}$  and  $\text{Cu}^{2+}$ ) would precipitate with  $\text{OH}^-$  (McLean,  
255 1982) resulting in the decrease of soil base cations and available micronutrients under  
256 soil coarseness.

257 Soil fine particles (< 0.25 mm), especially clay inside these fine particles were  
258 suggested to provide additional binding surfaces for exchangeable base cations and  
259 available micronutrients (Beldin et al., 2007). Confirmed by the negative correlation

260 of soil fine particles with both base cations (exchangeable Ca, Mg and Na) available  
261 micronutrients (Fe, Mn and Cu), the decrease of soil fine particles and clay content  
262 (Fig. S1) might also contribute to lower base cations and available micronutrients  
263 under soil coarseness. Consistent with our findings, previous studies also suggested  
264 that the decrease of soil fine particles and increase of soil coarseness resulted in loss  
265 of SOM as well as reduction in the nutrient storage (Lopez, 1998; Zhao et al., 2006;  
266 Zhou et al., 2008).

267 As the essential role of SOM in retaining base cations and micronutrients by its  
268 functional groups (Oorts et al., 2003), significantly lower soil base cations and  
269 micronutrients would possibly due to lower C (the largest component of SOM)  
270 concentration in coarsen soils. This can be further enhanced by the significant positive  
271 correlation of soil C with both base cations and micronutrients (Table 3). Consistently,  
272 Vittori Antisari et al. (2013) reported that humified organic compounds in soil could  
273 retain base cations and decrease their leaching from soils. As compared to higher soil  
274 coarseness degree, higher soil microbial activities (unpublished data) under conditions  
275 of lower soil coarseness degree could promote humification or microbial-processing  
276 of the SOM (Wang et al., 2015b), potentially increasing the availability of functional  
277 groups to complex with the base cations and micronutrients. Due to the fact of  
278 reduction in ecosystem productivity under cation deficiencies (Lawrence et al., 1995;  
279 Cheng et al., 2010), the loss of base cations and available micronutrients as developed  
280 under soil coarseness could constrain both plant growth and pasture productivity of  
281 this nutrient poor sandy ecosystem.

282

## 283 **4.2 Effect of soil depth on base cations and available micronutrients**

284 The hypothesized decrease of exchangeable base cations and available micronutrients  
285 with soil depth was partially supported as only exchangeable Mg (Fig. 3b), available  
286 Fe (Fig. 4a), Mn (Fig. 4b) and Zn (Fig. 4d) decreased with soil depth. Vertical  
287 distribution of soil nutrients can be influenced by two opposite processes, leaching  
288 and biological cycling (such as plant absorption) (Truggill, 1988). Being a ubiquitous  
289 process in ecosystems, plant absorption of nutrients can transport soil elements  
290 aboveground and return the litterfall to soil surface (Stark, 1994). Especially in this  
291 sandy land or desertified grassland, plants tend to accumulate SOM or nutrients to  
292 form 'island of fertility' (Cao et al., 2008). In these sandy soils, leaching is also an  
293 essential process in shaping the vertical distribution of soil nutrients (Truggill, 1988).  
294 As leaching moves nutrients downward while biological cycling moves them upward  
295 (Jobb gy and Jackson, 2001), the unchanged Ca, K and Na concentrations might be  
296 the combining effects of leaching and biological cycling. This area experiences  
297 freeze-thaw cycles for at least 4-5 months per year (Alamusa et al., 2014).  
298 Freeze-thaw cycles might promote the leaching of exchangeable Ca, K and Na from  
299 surface to subsoil resulting in the unchanged base cations along soil profile. Our  
300 results are in contrast with previous studies suggesting that ecosystem were more  
301 capable to retain K than other base cations (Nowak et al., 1991; Jobb gy and Jackson,  
302 2001). In this case, it is obvious that many environmental factors, like soil types and  
303 plant community composition can be drivers for the vertical distribution of base

304 cations and micronutrients. The leaching of base cations to subsoils might enhance  
305 mineral weathering process and pedogenesis by forming kaolinite in topsoils as rapid  
306 removing of water-soluble elements (such as exchangeable Ca and Na) (Chadwick  
307 and Chorover, 2001). Stronger effect of plant absorption than leaching might  
308 contribute to the shallower distribution of exchangeable Mg (Fig. 3b), available Fe  
309 (Fig. 4a), Mn (Fig. 4b) and Zn (Fig. 4d). The dominant role of plant cycling in  
310 determining the vertical distribution of Mg, Fe, Mn and Zn might illustrate that these  
311 elements were scarcer and more limiting nutrients for plant growth in this semi-arid  
312 sandy ecosystem (Jobb gy and Jackson, 2001).

313

## 314 **5 Conclusions**

315 The results showed that grassland soil coarseness decreased soil base cations of  
316 exchangeable Ca, Mg and Na as well as available micronutrients of Fe, Mn and Cu.  
317 The loss of SOM, decrease of soil fine particles, and increase of soil pH were the  
318 main driving factors for the decrease of base cations and micronutrient availability as  
319 affected by soil coarseness. Unchanged concentrations of exchangeable Ca, K and Na  
320 along the soil depth might result from the balance between plant cycling and leaching  
321 effects. The dominant role of plant cycling over leaching shaped the shallower  
322 distribution of exchangeable Mg as well as available Fe, Mn and Zn. The reduction  
323 and re-distribution of soil base cations and available micronutrients would potentially  
324 influence soil fertility and plant productivity in this desertified grassland ecosystem.

325



326 **Author contribution**

327 Z. Wang, G. Yu, and X. Han designed the experiments; and L. Lü and Y. Zhao carried  
328 them out. H. Liu and J. Yin help to do the laboratory analysis. L. Lü and R. Wang  
329 prepared the manuscript with contributions from all authors. Y. Jiang helped to revise  
330 the manuscript. Mr. Xiao created the figure of our experimental location.

331

332 **Acknowledgments**

333 This work was financially supported by the National Natural Science Foundation of  
334 China (41371251).

335

336 **References**

- 337 Alamusa, Niu C., Zong Q.: Temporal and spatial changes of freeze-thaw cycles in  
338 Ulan'aodu Region of Horqin Sandy Land, Northern China in a changing climate,  
339 Soil Sci. Soc. Am. J., 78, 89-96, 2014.
- 340 Allington, G., Valone, T.: Reversal of desertification: the role of physical and  
341 chemical soil properties, J. Arid Environ., 74, 973-977, 2010.
- 342 Antisari, L. V., Carbone, S., Gatti, A., Vianello, G., Nannipieri, P.: Toxicity of metal  
343 oxide (CeO<sub>2</sub>, Fe<sub>3</sub>O<sub>4</sub>, SnO<sub>2</sub>) engineered nanoparticles on soil microbial biomass and  
344 their distribution in soil, Soil Biol. Biochem., 60, 87-94, 2013.
- 345 Barbero-Sierra, C., Marques, M. J., Ruiz-Pérez, M., Escadafal, R., Exbrayat, W.: How  
346 is desertification research addressed in Spain? Land versus soil approaches, Land  
347 Degrad. Dev., 26, 423-432, 2015.

348 Beldin, S. I., Caldwell, B. A., Sollins, P., Sulzman, E. W., Lajtha, K., Crow, S. E.:  
349 Cation exchange capacity of density fractions from paired conifer/grassland soils,  
350 Biol. Fertil. Soils, 43, 837-841, 2007.

351 Beyene, F.: Incentives and Challenges in Community - Based Rangeland Management:  
352 Evidence from Eastern Ethiopia, Land Degrad. Dev., 26, 502-509, 2015.

353 Bisaro, A., Kirk, M., Zdruli, P., Zimmermann, W.: Global drivers setting  
354 desertification research priorities: insights from a stakeholder consultation forum,  
355 Land Degrad. Dev., 25, 5-16, 2014.

356 Cao, C., Jiang, D., Teng, X., Jiang, Y., Liang, W., Cui, Z.: Soil chemical and  
357 microbiological properties along a chronosequence of *Caragana microphylla* Lam.  
358 plantations in the Horqin sandy land of Northeast China. Appl. Soil Ecol., 40, 78-85,  
359 2008.

360 Cerdà A., Gallart, F., Li, J., Papanastasis, V. P., Parmenter, R. R., Turnbull, L.,  
361 Parsons, A. J., Wainwright, J.: Long-range ecogeomorphic processes, in:  
362 Self-organized ecogeomorphic systems: confronting models with data for  
363 land-degradation in drylands, edited by: Müller, E. N., Wainwright, J., Parsons, A.  
364 J., Turnbull, L., Springer, Dordrecht 103 – 139, 2014.

365 Cheng, L., Zhu, J., Chen, G., Zheng, X., Oh, N. H., Ruyty, T., Hu, S.: Atmospheric  
366 CO<sub>2</sub> enrichment facilitates cation release from soil, Ecol. Lett., 13, 284-291, 2010.

367 Chen, F., Zeng, D., Narain, S. A., Chen, G.: Effects of soil moisture and soil depth on  
368 nitrogen mineralization process under Mongolian pine plantations in Zhanggutai  
369 sandy land, PR China, J. Forest. Res., 16, 101-104, 2005.

370 Chadwick, O.A., Chorover, Jon: The chemistry of pedogenic thresholds, *Geoderma*,  
371 100, 321-353, 2001.

372 Conte, C. A.: The forest becomes desert: Forest use and environmental change in  
373 Tanzania's West Usambara mountains, *Land Degrad. Dev.*, 10, 291-309, 1999.

374 Escadafal, R., Barbero-Sierra, C., Exbrayat, W., Marques, M. J., Akhtar-Schuster, M.,  
375 El Haddadi, A., Ruiz, M.: First appraisal of the current structure of research on land  
376 and soil degradation as evidenced by bibliometric analysis of publications on  
377 desertification, *Land Degrad. Dev.*, 26, 413-422, 2015.

378 Fleskens, L., Stringer, L. C.: Land management and policy responses to mitigate  
379 desertification and land degradation. *Land Degrad. Dev.*, 25, 1-4, 2014.

380 Goodall, D. W.: Some considerations in the use of point quadrats for the analysis of  
381 vegetation, *Aust. J. Biol. Sci.*, 5, 1-41, 1952.

382 Huang, D., Wang, K., Wu, W.: Dynamics of soil physical and chemical properties and  
383 vegetation succession characteristics during grassland desertification under sheep  
384 grazing in an agro-pastoral transition zone in Northern China, *J. Arid Environ.*, 70,  
385 120-136, 2007.

386 IUSS Working Group WRB: World Reference Base for Soil Resources 2014.  
387 International soil classification system for naming soils and creating legends for  
388 soil maps, World Soil Resources Reports No. 106. FAO, Rome, 2014.

389 Jobb ágy, E. G., Jackson, R. B.: The distribution of soil nutrients with depth: global  
390 patterns and the imprint of plants, *Biogeochemistry*, 53, 51-77, 2001.

391 Lawrence, G. B., David, M. B., Shortle, W.C.: A new mechanism for calcium loss in

392 forest-floor soils, *Nature*, 378, 162-165, 1995.

393 Li, F., Zhao, L., Zhang, H., Zhang, T., Shirato, Y.: Wind erosion and airborne dust  
394 deposition in farmland during spring in the Horqin Sandy Land of eastern Inner  
395 Mongolia, China, *Soil and Tillage Research*, 75, 121-130, 2004.

396 Li, F., Cook, S., Geballe, G. T., Burch, Jr. W. R., Rainwater harvesting agriculture: an  
397 integrated system for water management on rainfed land in China's semiarid areas,  
398 *AMBIO: A Journal of the Human Environment*, 29, 477-483, 2000.

399 Lindsay, W. L., Norvell, W. A., Development of a DTPA soil test for zinc, iron,  
400 manganese, and copper, *Soil Sci. Soc. Am. J.*, 42, 421-428, 1978.

401 Lopez, M.: Wind erosion in agricultural soils: an example of limited supply of  
402 particles available for erosion, *Catena*, 33, 17-28, 1998.

403 Lu, X., Mao, Q., Gilliam, F. S., Luo, Y., Mo, J: Nitrogen deposition contributes to soil  
404 acidification in tropical ecosystems, *Global Change Biol.*, 20, 3790-3801, 2014.

405 Marques, M. J., Bienes, R., Cuadrado, J., Ruiz-Colmenero, M., Barbero-Sierra, C.,  
406 Velasco, A.: Analysing perceptions attitudes and responses of winegrowers about  
407 sustainable land management in central Spain, *Land Degrad. Dev.*, 26, 458-467,  
408 2015.

409 McLean, E. O.: Soil pH and lime requirement, in: *Methods of soil analysis, Part 2,*  
410 *Chemical and microbiological properties*, edited by: Page, A. L., Miller, R. H.,  
411 Keeney, D. R., American Society of Agronomy, Madison, WI, USA, 199-224,  
412 1982.

413 Miao, L., Moore, J. C., Zeng, F., Lei, J., Ding, J., He, B., Cui, X.: Footprint of

414 research in desertification management in China, *Land Degrad. Dev.*, 26, 450-457,  
415 2015.

416 Nowak, C., Downard, R., White, E.: Potassium trends in red pine plantations at Pack  
417 Forest, New York, *Soil Sci. Soc. Am. J.*, 55, 847-850, 1991.

418 Ochoa-Hueso, R., Bell, M. D., Manrique, E.: Impacts of increased nitrogen deposition  
419 and altered precipitation regimes on soil fertility and functioning in semiarid  
420 Mediterranean shrublands, *J. Arid Environ.*, 104, 106-115, 2014.

421 Oorts, K., Vanlauwe, B., Merckx, R.: Cation exchange capacities of soil organic  
422 matter fractions in a Ferric Lixisol with different organic matter inputs, *Agr.*  
423 *Ecosyst. Environ.*, 100, 161-171, 2003.

424 Schlesinger, W. H., Reynolds, J., Cunningham, G. L., Huenneke, L., Jarrell, W.,  
425 Virginia, R., Whitford, W.: Biological feedbacks in global desertification, *Science*,  
426 247, 1043-1048, 1990.

427 Sharma, B., Arora, H., Kumar, R., Nayyar, V.: Relationships between soil  
428 characteristics and total and DTPA-extractable micronutrients in Inceptisols of  
429 Punjab. *Commun. Soil Sci. Plan.*, 35, 799-818, 2004.

430 Stark, J. M.: Causes of soil nutrient heterogeneity at different scales. in: *Exploitation*  
431 *of Environmental Heterogeneity by Plants: Ecophysiological Processes Above and*  
432 *Below Ground*, edited by Caldwell, M. M, Pearcy, R., J. Wiley & Sons, NY, pp.  
433 255-284, 1994.

434 Torres, L., Abraham, E. M., Rubio, C., Barbero, C., Ruiz, M.: Desertification research  
435 in Argentina, *Land Degrad. Dev.*, 26, 433-440, 2015.

436 Vieira, R. M. S. P., Tomasella, J., Alvalá R. C. S., Sestini, M. F., Affonso, A. G.,  
437 Rodriguez, D. A., Barbosa, A. A., Cunha, A. P. M. A., Valles, G. F., Crepani, E., de  
438 Oliveira, S. B. P., de Souza, M. S. B., Calil, P. M., de Carvalho, M. A., Valeriano, D.  
439 M., Campello, F. C. B., Santana, M. O.: Identifying areas susceptible to  
440 desertification in the Brazilian northeast, *Solid Earth*, 6, 347-360, 2015.

441 Wang, T., Xue, X., Zhou, L., Guo, J.: Combating aeolian desertification in northern  
442 China, *Land Degrad. Dev.*, 26, 118-132, 2015a.

443 Wang R., Dungait, J. A. J., Creamer, C. A., Cai, J., Li, B., Xu, Z., Zhang, Y., Ma, Y.,  
444 Jiang, Y.: Carbon and nitrogen dynamics in soil aggregates under long-term  
445 nitrogen and water addition in a temperate steppe, *Soil Sci. Soc. Am. J.*, 79,  
446 527-535, 2015b.

447 Weinzierl, T., Wehberg, J., Böhner, J., Conrad, O.: Spatial Assessment of Land  
448 Degradation Risk for the Okavango River Catchment, Southern Africa, *Land*  
449 *Degrad. Dev.*, in press, 2015. DOI: 10.1002/ldr.2426

450 Xie, L., Zhong, J., Cao, F., Li, J., Wu, L.: Evaluation of soil fertility in the succession  
451 of karst rocky desertification using principal component analysis, *Solid Earth*, 6,  
452 515-524, 2015.

453 Xu, Q., Wang, T., Cai, C., Li, Z., Shi, Z.: Effects of soil conservation on soil  
454 properties of citrus orchards in the Three - Gorges Area, China, *Land Degrad. Dev.*,  
455 23, 34-42, 2012.

456 Yan, X., Cai, Y.: Multi-scale anthropogenic driving forces of karst rocky  
457 desertification in Southwest China, *Land Degrad. Dev.*, 26, 193-200, 2015.

458 Zhang, Y., Xu, Z., Jiang, D., Jiang, Y.: Soil exchangeable base cations along a  
459 chronosequence of *Caragana microphylla* plantation in a semi-arid sandy land,  
460 China, *J. Arid Land*, 5, 42-50, 2013.

461 Zhao, H., Zhou, R., Zhang, T., Zhao, X.: Effects of desertification on soil and crop  
462 growth properties in Horqin sandy cropland of Inner Mongolia, north China, *Soil*  
463 *Till. Res.*, 87, 175-185, 2006.

464

465 **Tables**

466

467 **Table 1** Mean and range of soil chemical characteristics for 0-10 cm soil in different  
 468 soil coarseness degrees from 0% sand addition (C0) to 70% (C70).

|                                                      | Range of mean from C0 to C70 |
|------------------------------------------------------|------------------------------|
| Soil organic carbon (g kg soil <sup>-1</sup> )       | 4.1-2.7                      |
| Total nitrogen (g kg soil <sup>-1</sup> )            | 0.48-0.22                    |
| Dissolved organic carbon (mg kg soil <sup>-1</sup> ) | 66.3-53.9                    |
| Microbial biomass C (mg kg soil <sup>-1</sup> )      | 104.3-60.4                   |
| Electric conductivity (μs cm <sup>-1</sup> )         | 54.7-44.7                    |

469

470 **Table 2** Results (*F* values) of two-way ANOVAs on the effect of soil depth (D),  
 471 treatments of soil coarseness degrees (T), and their interactions on soil base cations  
 472 (exchangeable Ca, Mg, K, and Na) and available micronutrients (Fe, Mn, Cu, and Zn).

|     | pH      | Ca      | Mg      | K    | Na     | Fe       | Mn      | Cu      | Zn      |
|-----|---------|---------|---------|------|--------|----------|---------|---------|---------|
| D   | 17.33** | 0.99    | 4.54*   | 0.74 | 0.22   | 135.67** | 99.63** | 9.69**  | 22.13** |
| T   | 31.74** | 50.26** | 57.22** | 1.61 | 2.35   | 41.51**  | 12.11** | 10.60** | 0.62    |
| DXT | 4.12**  | 1.49    | 3.81**  | 0.64 | 5.02** | 2.97**   | 2.49*   | 3.40**  | 0.83    |

473 \* Significance level at  $P < 0.05$ .

474 \*\* Significance level at  $P < 0.01$ .

475

476



477 **Table 3** Regression statistics relating soil base cations (exchangeable Ca, Mg, K, and  
 478 Na) and available micronutrients (Fe, Mn, Cu, and Zn) to soil pH, soil fine particles  
 479 (<0.25 mm) and soil organic carbon (SOC).

|    | Soil pH | < 0.25mm | SOC    | Multiple |
|----|---------|----------|--------|----------|
| Ca | -0.67   | 0.81**   | 0.73   | 0.81     |
| Mg | -0.75   | 0.87**   | 0.72   | 0.87     |
| K  | —       | —        | —      | —        |
| Na | -0.54   | 0.56**   | 0.56   | 0.56     |
| Fe | -0.87** | 0.80     | 0.74   | 0.87     |
| Mn | -0.42   | 0.49**   | 0.45   | 0.49     |
| Cu | -0.68   | 0.72     | 0.77** | 0.77     |
| Zn | —       | —        | —      | —        |

480 Values are *R* statistics for significant ( $P < 0.05$ ) linear regressions. Multiple is *R*  
 481 values for multiple regressions (stepwise removal) of soil base cation and  
 482 micronutrients with soil pH, <0.25 mm fine particles, and SOC. \*\* indicates variables  
 483 that make significant contributions to the multiple linear regressions.  
 484

485 **Figure Legends**

486 **Fig. 1** Location of the experimental site.

487

488 **Fig. 2** Soil pH values for three soil depths (a) and proportion of soil fine particles (<  
489 0.25 mm) for 0-10 cm soil in different soil coarseness degrees of 0% sand addition  
490 (C0), 10% (C10), 30% (C30), 50% (C50) and 70% (C70). Data represent mean  $\pm$  SE  
491 (n=6). Letters indicate significant differences among treatments (lowercase letters)  
492 and differences among soil depths when averaging across all treatments (capital  
493 letters).

494

495 **Fig. 3** Soil base cations of exchangeable Ca (a), Mg (b), K (c) and Na (d) for three  
496 soil depths in different soil coarseness degrees of 0% sand addition (C0), 10% (C10),  
497 30% (C30), 50% (C50) and 70% (C70). Data represent mean  $\pm$  SE (n=6). Letters  
498 indicate significant differences among treatments (lowercase letters) and differences  
499 among soil depths when averaging across all treatments (capital letters).

500

501 **Fig. 4** Soil available micronutrients of available Fe(a), Mn (b), Cu (c) and Zn (d) for  
502 three soil depths in different soil coarseness degrees of 0% sand addition (C0), 10%  
503 (C10), 30% (C30), 50% (C50) and 70% (C70). Data represent mean  $\pm$  SE (n=6).  
504 Letters indicate significant differences among treatments (lowercase letters) and  
505 differences among soil depths when averaging across all treatments (capital letters).

506

507

508 **Fig. S1** Proportion of soil clay particles for 0-10 cm soil in different soil coarseness  
509 degrees of 0% sand addition (C0), 10% (C10), 30% (C30), 50% (C50) and 70% (C70).  
510 Data represent mean  $\pm$ SE (n=6). Letters indicate significant differences among  
511 treatments.  
512

513

514 **Fig. 1**

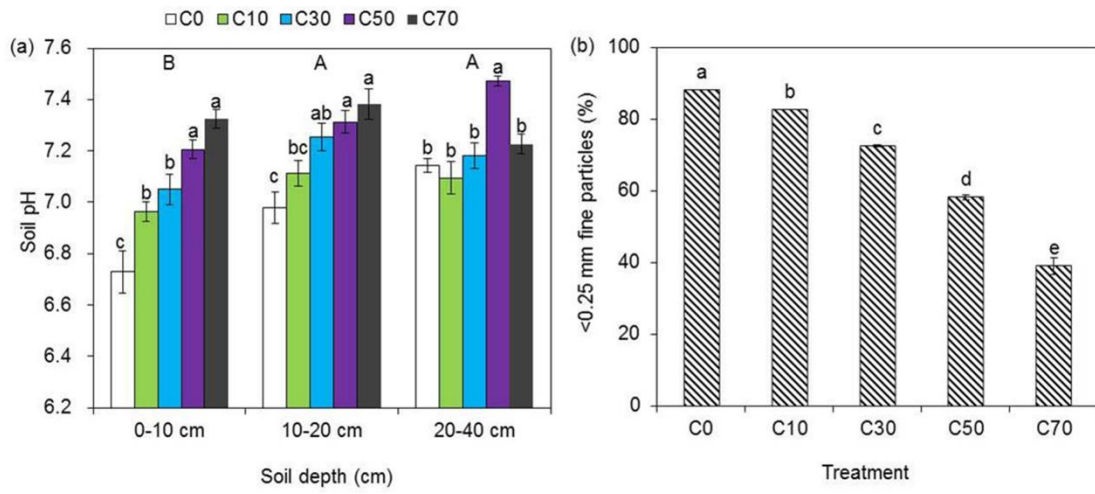

515

516

517

518 **Fig. 2**

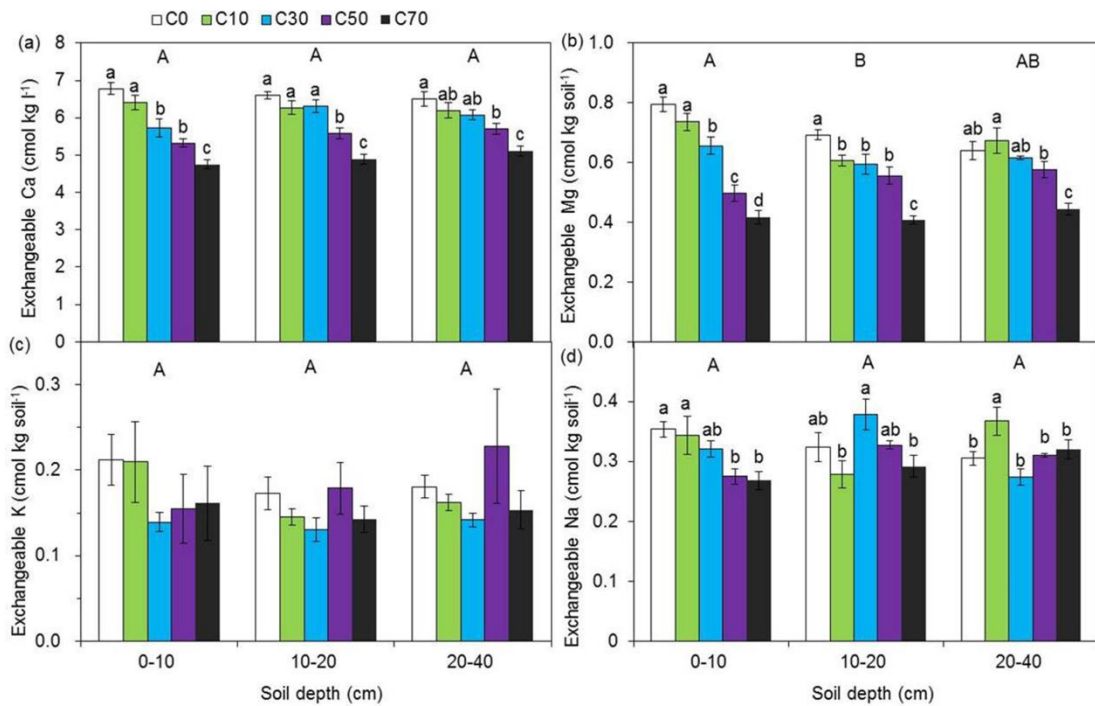

519

520

521

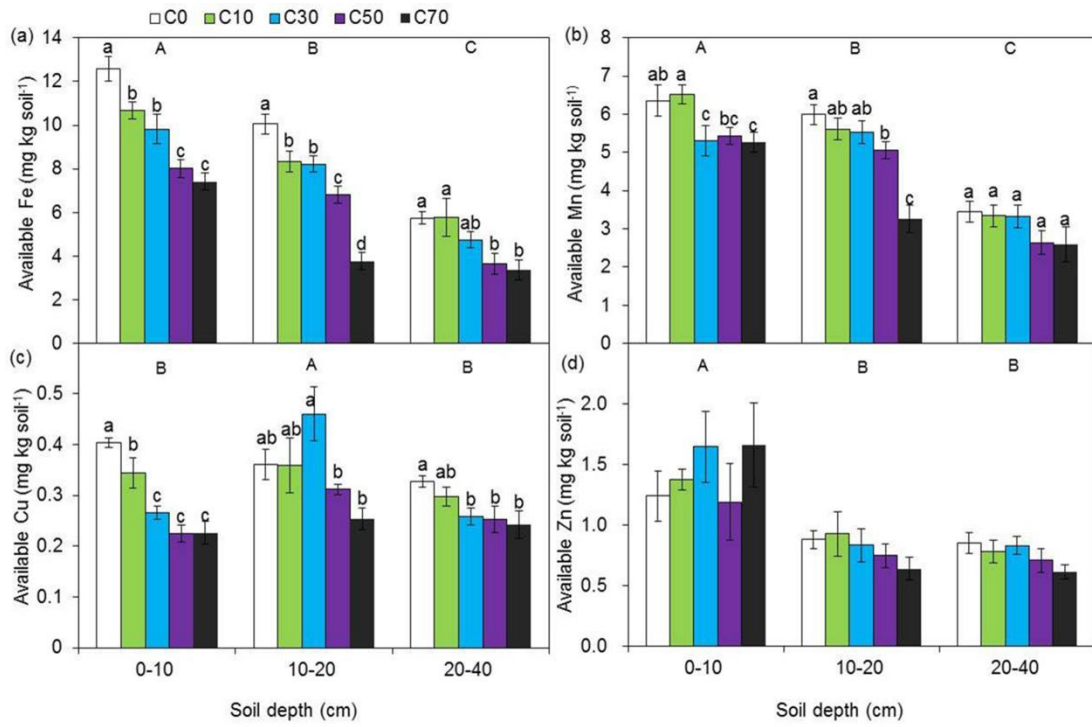

523

524

525 **Fig. S1**

526

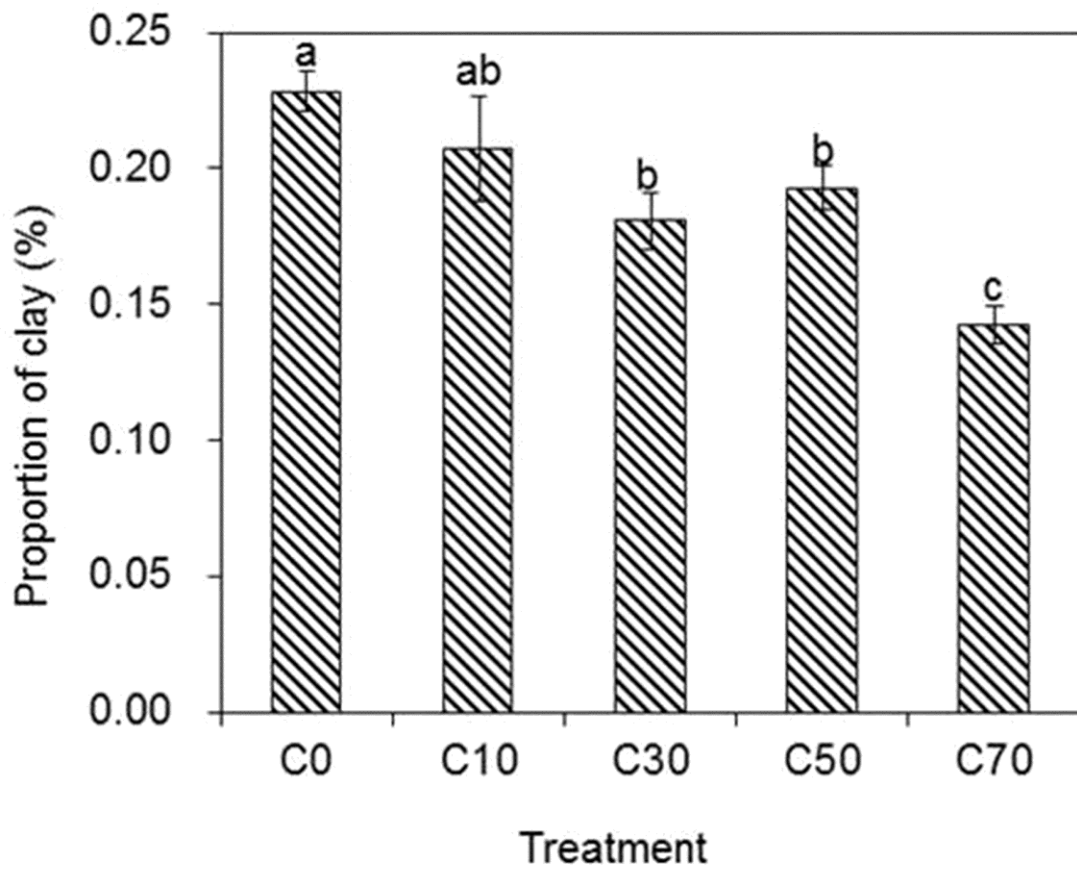

527
